# Supplementary material for: Involvement of Histone Acetylation of Sox17 and Foxa2 Promoters during Mouse Definitive Endoderm Differentiation Revealed by MicroRNA Profiling
Source: PLoS One. 2011 Nov 23;6(11):e27965. doi: 10.1371/journal.pone.0027965 (PMC3223193; doi:10.1371/journal.pone.0027965)
Supplement: Table S4 — Differentially expressed miRNAs at day5 samples. Identification of differentially expressed miRNAs was described in the methods section. 118 differentially expressed miRNAs under the cutoff as FDR <0.05 and fold>2 or <0.5 were identified from the 5 day samples. (XLS) [file pone.0027965.s012.xls]

## Sheet: 5 day_Fold change = 2
Table S4.differentially expressed miRNAs at day5 samples
SystematicName	Fold change([3a-5d] vs [B27-5d])	Regulation([3a-5d] vs [B27-5d])	Fold change([A-5d] vs [B27-5d])	Regulation([A-5d] vs [B27-5d])	Fold change([Aplus3a-5d] vs [B27-5d])	Regulation([Aplus3a-5d] vs [B27-5d])	3a-1_5d	3a-2_5d	3a-3_5d	A+3a-1_5d	A+3a-2_5d	A+3a-3_5d	A-1_5d	A-2_5d	A-3_5d	B27-1_5d	B27-2_5d	B27-3_5d
mcmv-miR-m22-1	1.20147	down	1.30428	down	5.38067	down	2.42216	2.28928	1.92759	0.056529	0.0539858	0.0395748	1.99416	2.01186	2.27766	2.56425	2.31627	2.55293
mcmv-miR-M23-1-3p	1.27901	down	1.93821	down	2.68247	down	8.47831	7.86721	7.97116	6.97282	7.09302	7.04524	7.52907	7.67496	7.31355	8.67733	8.18197	8.52246
mcmv-miR-m88-1	1.1561	up	1.631	down	2.1202	down	6.88338	7.11277	5.94101	5.65399	5.46318	4.93956	5.59301	5.8581	5.74095	6.56145	6.32426	6.42363
mmu-let-7e	1.62851	down	5.26476	up	8.58802	up	0.0179283	2.27766	2.88129	5.41768	5.52283	5.65399	4.87288	4.60885	4.99491	2.3029	2.332	2.65263
mmu-miR-100	1.00145	down	78.4993	down	76.5855	down	6.62407	5.8581	6.43867	0.056529	0.0539858	0.0395748	0.00863695	0.00863695	0.025994	6.28786	6.24877	6.39046
mmu-miR-10a	2.35262	up	5.62082	down	4.59462	down	4.12726	5.65399	6.26784	1.84863	1.92759	1.97023	1.59568	1.45265	1.82561	4.10996	4.14977	4.08655
mmu-miR-10b	1.75223	up	2.8446	down	1.85075	up	5.17131	6.0862	6.7613	5.99163	6.0365	6.22742	3.71662	3.61661	3.73333	5.11278	5.2266	5.25185
mmu-miR-1224	1.34084	down	1.33074	down	2.16756	down	13.0266	12.6249	13.0266	12.4679	12.2023	11.9291	12.8421	13.0266	12.8421	13.3159	13.3159	13.3159
mmu-miR-124	1.03849	up	41.7893	down	43.5334	down	7.97116	7.64842	7.505	2.332	2.22712	2.06982	2.24452	2.25849	2.3029	7.76986	7.45358	7.73766
mmu-miR-124*	1.58794	down	21.9202	down	21.3858	down	4.58699	3.33513	3.48224	0.056529	0.0539858	0.0395748	0.00863695	0.00863695	0.025994	4.4585	4.48884	4.4585
mmu-miR-125a-5p	1.17631	up	3.56928	up	4.54887	up	5.51169	5.33328	5.79872	7.39603	7.4264	7.67496	7.21336	7.16266	7.07175	5.19974	5.38075	5.36038
mmu-miR-125b-5p	1.04554	down	6.02084	down	3.53308	down	8.04585	8.21863	8.52246	6.32426	6.45632	6.7363	5.81647	5.71868	5.67461	8.21863	8.43204	8.32899
mmu-miR-129-3p	1.76928	down	2.43138	down	2.71155	down	4.4585	3.16085	3.59514	3.22854	3.14749	2.99059	3.27498	3.22854	3.33513	4.56681	4.56681	4.55035
mmu-miR-130b	1.11133	down	2.4849	down	2.97928	down	10.2519	9.10904	9.36112	8.0799	8.15549	8.21863	8.47831	8.43204	8.32899	9.57838	9.80026	9.80026
mmu-miR-130b*	2.26878	down	6.07051	down	6.17892	down	2.55293	3.99446	4.4585	2.21618	2.17575	2.27766	2.3029	2.21618	2.22712	4.85055	4.85055	4.85055
mmu-miR-135a*	1.07952	down	1.76508	down	2.34177	down	9.02127	8.04585	8.18197	7.23451	7.37464	7.2883	7.70843	7.73766	7.67496	8.47831	8.52246	8.57948
mmu-miR-136*	1.52745	up	3.63672	up	3.34538	up	2.70332	4.96329	3.73333	5.11278	4.82975	4.85055	5.11278	5.13402	4.90769	3.16085	3.22854	3.17717
mmu-miR-141	7.26891	up	44.7864	up	41.5546	up	2.76239	4.32145	2.15515	5.67461	5.8581	5.25185	5.71868	5.83855	5.55151	0.604374	0.0233966	0.025994
mmu-miR-143	1.10279	up	4.58342	up	5.54665	up	0.0179283	0.465473	0.00462898	2.17575	2.86356	2.4401	2.27766	2.40595	1.97023	0.0151774	0.0233966	0.025994
mmu-miR-152	1.11896	down	3.01582	up	2.60011	up	3.17717	3.50706	3.40776	5.05079	4.62893	5.03446	5.13402	5.05079	5.17131	3.22854	3.73333	3.61661
mmu-miR-153	1.03971	down	26.7637	down	26.1112	down	2.24452	6.6855	5.17131	0.056529	0.0539858	0.0395748	0.00863695	0.00863695	0.025994	5.07404	4.58699	4.60885
mmu-miR-16	2.02078	down	2.13952	down	2.07476	down	9.10904	9.43218	10.0024	9.49869	9.49869	9.43218	9.43218	9.43218	9.43218	10.4562	10.5661	10.5661
mmu-miR-181a	1.20733	up	15.138	down	11.6832	down	6.26784	4.21389	4.26562	1.57715	0.0539858	1.66166	1.18111	0.964464	0.025994	4.58699	4.62893	4.71596
mmu-miR-181b	1.05819	down	5.04979	down	6.91781	down	7.18648	6.0365	6.4736	4.16821	3.99446	3.40776	4.21389	4.10996	4.60885	6.65865	6.65865	6.62407
mmu-miR-181c	1.88991	up	2.16551	up	3.43467	up	2.65263	2.58224	2.25849	3.48224	3.3217	3.27498	2.67914	2.56425	2.83914	1.53823	1.7655	1.43468
mmu-miR-182	1.17711	up	2.39315	up	2.65775	up	6.7613	5.55151	6.0862	7.26095	7.2883	7.37464	7.23451	7.21336	7.02215	5.8883	5.83855	5.96642
mmu-miR-183	1.51598	down	2.32555	up	2.48004	up	4.19245	5.38075	5.8581	6.88338	7.04524	7.23451	7.07175	6.92962	6.88338	5.67461	5.74095	5.81647
mmu-miR-183*	1.35012	up	3.68933	up	3.89706	up	1.81464	0.377283	1.04115	2.76239	2.65263	2.40595	2.56425	2.27766	2.74197	0.587381	0.75116	0.595268
mmu-miR-185	1.21226	down	2.73403	down	2.53684	down	4.56681	3.59514	4.10996	3.21174	3.16085	2.70332	2.86356	3.00708	2.88129	4.30692	4.4585	4.3396
mmu-miR-1896	1.33286	down	1.68275	down	4.35697	down	6.64126	4.82975	5.05079	4.58699	3.89051	2.9179	5.03446	5.2266	5.25185	6.0606	5.81647	5.8883
mmu-miR-18a*	1.45089	down	1.86223	down	2.27046	down	3.12371	3.14749	3.27498	2.53924	2.53924	2.52956	2.88129	2.66672	2.9179	3.61661	3.84391	3.69648
mmu-miR-1901	1.288	down	1.3913	down	2.7419	down	5.33328	4.58699	3.87009	3.89051	3.48224	3.14749	4.3396	4.30692	4.80994	4.82975	5.09273	4.96329
mmu-miR-193	3.36499	up	3.13299	down	4.3219	down	3.73333	4.80994	3.19362	0.056529	0.0539858	0.0395748	0.758232	0.758232	0.025994	2.10438	2.19035	2.19035
mmu-miR-193b	1.0518	up	2.75789	down	2.06078	down	3.84391	2.67914	3.17717	1.59568	2.4401	2.31627	1.0601	1.81464	2.21618	2.99059	3.26249	3.22854
mmu-miR-196a	1.00975	down	3.06861	up	19.6477	up	0.0179283	0	0.00462898	4.3396	4.30692	4.30692	1.57715	1.41259	1.92759	0.0151774	0.0233966	0.025994
mmu-miR-196b	1.49206	up	8.55878	up	46.863	up	0.775667	0.26258	0.758232	5.57118	5.59301	5.55151	3.12371	2.99059	3.24248	0.0151774	0.0233966	0.025994
mmu-miR-199a-5p	1.96627	up	1.19516	down	3.49383	up	0.964464	1.59568	1.18111	2.19035	2.02708	2.01186	0.00863695	0.00863695	0.025994	0.765473	0.0233966	0.025994
mmu-miR-199b*	1.565	up	1.27783	down	2.06593	up	1.27861	2.55293	2.31627	2.39288	2.27766	2.67914	0.775667	0.849188	1.52336	1.45265	1.55728	1.19937
mmu-miR-200a	2.13356	up	20.4508	up	19.659	up	3.22854	5.15318	4.71596	7.61606	7.61606	7.47714	7.61606	7.70843	7.55566	3.26249	3.29291	3.26249
mmu-miR-200b	1.19828	up	9.83405	up	9.67956	up	5.63319	5.96642	6.24877	8.90026	8.96879	9.02127	8.96879	8.96879	9.02127	5.71868	5.65399	5.69283
mmu-miR-200c	2.47719	up	15.6569	up	17.3631	up	4.60885	3.90943	4.30692	6.99472	7.07175	7.18648	6.94916	6.94916	6.90694	2.9179	2.99059	2.99059
mmu-miR-205	3.89861	up	27.5168	up	21.9262	up	3.82622	2.17575	2.35985	5.2266	5.27682	5.33328	5.65399	5.51169	5.65399	0.59833	1.84863	0.025994
mmu-miR-20a	1.56813	down	3.94042	down	3.78726	down	10.9917	12.4679	12.4679	10.9917	10.4562	10.6633	10.5661	10.8074	10.5661	12.6249	12.6249	12.6249
mmu-miR-210	1.34899	up	3.34672	up	3.10045	up	7.04524	6.45632	6.33808	7.83382	7.80381	7.80381	7.93389	7.97116	7.86721	6.22742	6.18037	6.13622
mmu-miR-219	1.78467	up	94.0811	down	223.289	down	8.52246	10.1121	8.90026	0.056529	1.52336	0.0395748	2.01186	2.06982	1.27861	8.72796	7.90936	8.39046
mmu-miR-224	1.83144	down	2.66185	up	2.17843	up	0.0179283	0.758232	1.59568	2.99059	2.70332	2.66672	3.21174	2.83914	3.17717	1.52336	1.78366	1.68374
mmu-miR-23a	1.08666	down	3.04339	up	4.10906	up	6.01445	6.62407	7.16266	8.72796	8.77467	8.77467	8.43204	8.28966	8.25621	6.72085	6.7363	6.70372
mmu-miR-23b	1.40045	down	3.05348	up	3.25496	up	5.19974	5.81647	6.30514	7.90936	7.97116	8.00643	7.90936	7.86721	7.83382	6.20604	6.30514	6.26784
mmu-miR-24	1.21896	up	3.42062	up	4.05214	up	7.23451	7.02215	7.31355	8.96879	8.90026	8.90026	8.72796	8.67733	8.63074	6.92962	6.85401	6.92962
mmu-miR-24-2*	1.00975	down	2.37158	up	3.91815	up	0.0179283	0	0.00462898	1.81464	2.37678	1.78366	1.95051	1.82561	0.025994	0.0151774	0.0233966	0.025994
mmu-miR-27a	1.79893	down	4.14674	up	4.95184	up	2.67914	6.41059	6.45632	8.28966	8.28966	8.43204	8.11848	8.11848	8.00643	6.0365	6.0365	6.01445
mmu-miR-27b	1.11697	down	3.94551	up	4.11372	up	4.62893	5.61593	5.69283	7.47714	7.55566	7.505	7.45358	7.47714	7.4264	5.4416	5.46318	5.51169
mmu-miR-290-3p	1.84202	up	2.23425	up	3.21955	up	4.28972	4.10996	3.82622	4.24689	4.87288	5.52283	4.36445	4.58699	4.10996	3.33513	2.83914	3.40776
mmu-miR-291a-3p	2.57154	up	5.68687	up	6.84844	up	11.341	10.9917	10.5661	12.2023	12.4679	12.4679	12.2023	12.2023	11.9291	9.80026	9.43218	9.57838
mmu-miR-291a-5p	3.69413	up	13.4656	up	14.3314	up	6.20604	2.3029	4.3396	6.0365	6.20604	6.4736	6.22742	6.22742	5.99163	2.39288	2.35985	2.4401
mmu-miR-292-3p	1.45704	up	2.61301	up	3.40656	up	11.1553	10.5661	10.6633	11.9291	11.9291	12.2023	11.6376	11.6376	11.6376	10.2519	10.2519	10.2519
mmu-miR-292-5p	2.21822	up	4.06108	up	4.24999	up	6.0365	4.14977	5.11278	6.0606	5.96642	6.0862	6.0365	5.99163	5.8883	4.14977	3.85716	3.84391
mmu-miR-293	1.18787	up	3.04513	up	3.37077	up	9.89964	9.89964	10.4562	11.4945	11.6376	11.6376	11.4945	11.341	11.4945	9.49869	10.1121	9.89964
mmu-miR-293*	1.22812	up	5.05117	up	6.13246	up	0.0179283	1.11992	0.38796	3.3217	2.74197	2.42216	2.40595	2.37678	2.86356	0.0151774	0.595268	0.025994
mmu-miR-294	1.71061	up	3.64104	up	4.64305	up	12.2023	11.4945	11.9291	13.3159	13.3159	13.3159	13.0266	12.8421	13.0266	10.9917	11.1553	11.1553
mmu-miR-294*	1.85482	up	10.2811	up	12.3217	up	3.27498	1.34973	3.14749	5.17131	5.33328	5.46318	5.27682	5.03446	4.87288	1.82561	1.99416	1.27861
mmu-miR-295	1.02493	up	3.2574	up	3.73437	up	10.5661	11.1553	10.9917	12.8421	12.8421	12.6249	12.6249	12.6249	12.4679	10.8074	10.9917	10.8074
mmu-miR-295*	2.23779	up	4.50022	up	5.2039	up	3.87009	2.56425	2.01186	4.28972	4.21389	3.59514	3.84391	3.71662	3.90943	1.97023	1.57715	1.41259
mmu-miR-29a	1.14576	down	2.62098	up	2.45102	up	3.3217	3.29291	3.71662	4.93956	4.80994	5.05079	5.09273	4.96329	5.03446	3.69648	3.71662	3.50706
mmu-miR-29b	1.8324	up	5.81867	up	4.38595	up	1.92759	4.4585	2.76239	4.26562	4.55035	4.10996	4.85055	4.80994	4.48884	2.17575	2.17575	2.17575
mmu-miR-300*	1.43431	up	2.10245	up	1.05063	down	0.401944	1.19937	0.323621	0.056529	0.0539858	0.0395748	1.55728	0.673067	1.34973	0.314477	0.0233966	0.025994
mmu-miR-301b	1.27454	up	1.62419	down	2.39094	down	6.18037	7.16266	6.18037	4.90769	4.96329	4.82975	5.36038	5.63319	5.38075	6.24877	6.11235	6.11235
mmu-miR-302a	1.24071	down	4.51399	up	4.34647	up	8.90026	8.47831	8.63074	11.1553	10.9917	11.1553	11.1553	11.1553	11.1553	9.02127	8.90026	9.02127
mmu-miR-302a*	2.11628	down	11.9435	up	9.79167	up	0.587381	1.41259	1.57715	5.55151	5.63319	5.51169	5.94101	5.81647	5.79872	2.21618	2.28928	2.31627
mmu-miR-302c	1.59218	down	4.23828	up	3.98142	up	6.70372	6.57975	6.94916	9.43218	9.43218	9.36112	9.49869	9.49869	9.49869	7.39603	7.39603	7.45358
mmu-miR-302d	1.6373	down	3.21422	up	3.01186	up	7.67496	8.72796	8.72796	10.5661	10.6633	10.8074	10.9917	10.6633	10.6633	9.10904	9.04676	9.10904
mmu-miR-30a	1.19606	up	2.32769	down	2.08164	down	8.11848	7.67496	7.64842	6.39046	6.50034	6.60303	6.32426	6.36177	6.32426	7.55566	7.55566	7.55566
mmu-miR-30a*	1.01469	up	5.41107	down	5.32338	down	4.08655	3.19362	3.29291	1.66166	0.0539858	1.55728	1.04115	1.04115	1.11992	3.50706	3.40776	3.59514
mmu-miR-30d	1.09068	up	2.10481	down	2.12924	down	6.94916	5.94101	5.8883	4.96329	5.03446	5.13402	4.99491	5.11278	5.07404	6.18037	6.13622	6.0862
mmu-miR-30e*	1.7157	down	3.02238	down	2.80968	down	3.99446	4.3396	4.48884	3.27498	3.71662	3.69648	3.48224	3.40776	3.48224	5.05079	5.07404	5.03446
mmu-miR-31	1.01277	down	5.03961	up	5.10675	up	3.00708	2.53924	2.9179	5.25185	5.17131	5.15318	5.19974	5.09273	5.2266	2.67914	3.16085	2.67914
mmu-miR-31*	1.13875	up	3.85324	up	4.01904	up	0.0179283	0.604374	0.00462898	1.97023	1.82561	2.28928	2.19035	2.15515	1.55728	0.0151774	0.0233966	0.025994
mmu-miR-322*	1.64386	down	2.62513	down	2.56113	down	1.11992	0.370305	0.578956	0.056529	0.0539858	0.0395748	0.00863695	0.00863695	0.025994	1.11992	1.52336	1.57715
mmu-miR-325	2.56767	down	4.32682	down	4.22133	down	0.0179283	0.849188	1.43468	0.056529	0.0539858	0.0395748	0.00863695	0.00863695	0.025994	2.01186	2.21618	2.15515
mmu-miR-326	1.12966	down	2.30159	down	2.24548	down	1.25749	1.27861	0.587381	0.056529	0.0539858	0.0395748	0.00863695	0.00863695	0.025994	0.849188	1.27861	1.52336
mmu-miR-335-5p	1.25696	down	2.93244	down	2.99596	down	8.00643	9.15667	9.26948	7.55566	7.58859	7.52907	7.64842	7.52907	7.58859	9.15667	9.10904	9.15667
mmu-miR-340-5p	1.17958	up	2.06119	down	2.49298	down	5.39654	5.99163	5.33328	4.19245	4.12726	3.73333	4.24689	4.3396	4.28972	5.27682	5.39654	5.33328
mmu-miR-342-3p	1.10426	down	2.35549	down	2.20905	down	7.90936	7.4264	7.76986	6.50034	6.72085	6.88338	6.64126	6.62407	6.56145	7.83382	7.83382	7.86721
mmu-miR-344	1.28247	down	8.77443	down	8.56052	down	3.16085	2.65263	2.55293	0.056529	0.0539858	0.0395748	0.00863695	0.00863695	0.025994	3.00708	3.24248	3.19362
mmu-miR-365	1.10949	down	2.92343	down	2.74172	down	5.81647	5.59301	5.96642	4.36445	4.50891	4.58699	4.26562	4.4585	4.4585	5.96642	5.94101	5.91817
mmu-miR-367	1.37934	up	5.21256	up	4.54706	up	7.58859	9.36112	8.25621	10.0024	10.5661	9.80026	10.2519	10.4562	10.2519	8.25621	7.64842	7.90936
mmu-miR-375	3.17314	up	41.5276	up	68.9007	up	2.28928	1.08928	1.68374	5.96642	6.11235	6.30514	5.41768	5.33328	5.4416	0.0151774	0.0233966	0.025994
mmu-miR-377	1.8139	up	2.71588	up	2.60248	up	5.77182	6.70372	5.38075	6.43867	6.60303	6.37697	6.52097	6.65865	6.42363	5.17131	4.99491	5.11278
mmu-miR-429	1.77485	up	15.7636	up	15.1399	up	5.36038	4.55035	5.09273	8.04585	8.0799	8.15549	8.15549	8.18197	8.11848	4.08655	4.26562	4.16821
mmu-miR-455	1.23376	down	3.42194	down	4.35366	down	1.45265	2.06982	2.08514	0.056529	0.0539858	0.0395748	0.578956	0.587381	0.025994	2.04514	2.22712	2.24452
mmu-miR-466c-5p	3.11332	up	1.00625	down	2.2131	up	5.59301	5.77182	4.96329	5.09273	4.85055	4.90769	3.73333	3.82622	3.82622	3.71662	4.21389	3.48224
mmu-miR-467a	3.03802	up	1.51697	up	2.72811	up	5.83855	5.41768	5.41768	5.36038	5.48745	5.36038	4.60885	4.55035	4.50891	4.16821	3.87009	3.82622
mmu-miR-483	1.26047	down	1.47232	down	2.21305	down	7.73766	6.83147	7.13804	6.64126	6.42363	6.20604	6.97282	7.11277	6.94916	7.67496	7.505	7.52907
mmu-miR-489	1.00975	down	12.9733	up	6.43331	up	0.0179283	0	0.00462898	3.00708	2.72129	2.39288	3.61661	3.69648	3.84391	0.0151774	0.0233966	0.025994
mmu-miR-494	1.1429	down	2.65486	down	3.44777	down	13.3159	11.341	11.6376	10.8074	10.2519	10.4562	10.6633	10.9917	10.9917	12.2023	12.2023	12.4679
mmu-miR-497	1.29263	up	4.1149	up	3.09596	up	2.35985	2.76239	2.72129	3.85716	3.85716	3.90943	4.4585	4.24689	4.14977	2.31627	2.42216	1.99416
mmu-miR-503	1.01623	up	8.05273	down	6.63157	down	5.03446	5.05079	4.85055	2.37678	2.21618	2.08514	1.7655	2.04514	2.02708	4.96329	4.96329	4.93956
mmu-miR-546	1.00351	down	1.50634	down	3.73248	down	2.25849	2.22712	1.34973	0.056529	0.0539858	0.0395748	1.81464	1.68374	0.578956	2.08514	1.53823	2.22712
mmu-miR-551b	2.46582	down	3.82946	down	3.7361	down	0.0179283	1.25749	0.673067	0.056529	0.0539858	0.0395748	0.00863695	0.00863695	0.025994	1.81464	2.06982	1.97023
mmu-miR-665	1.06088	down	1.59124	up	2.177	up	1.19937	0.149467	0.328988	2.10438	1.78366	1.41259	1.08928	1.08928	1.7655	0.411359	0.849188	0.673067
mmu-miR-669b	2.91041	up	1.27171	up	2.02881	up	6.85401	6.97282	6.22742	6.11235	6.22742	6.1527	5.52283	5.55151	5.39654	5.2266	5.15318	5.05079
mmu-miR-672	3.12896	up	2.10292	down	1.60943	up	4.32145	3.85716	4.24689	3.16085	3.19362	3.19362	1.97023	1.11992	1.18111	2.40595	2.55293	2.52956
mmu-miR-685	1.29194	down	3.3247	down	6.96063	down	6.37697	4.52958	4.93956	2.9179	2.9179	2.72129	3.89051	3.87009	3.99446	5.63319	5.52283	5.79872
mmu-miR-708	1.68149	down	3.46287	down	3.57322	down	1.95051	0.401944	1.0601	0.056529	0.0539858	0.0395748	0.00863695	0.25123	0.025994	1.78366	1.95051	1.92759
mmu-miR-709	1.40008	down	3.33558	down	3.00119	down	11.6376	10.6633	11.1553	10.4562	9.80026	9.89964	9.89964	9.89964	9.89964	11.6376	11.6376	11.6376
mmu-miR-712*	1.09235	down	1.50556	down	2.56846	down	5.48745	4.26562	3.89051	3.40776	3.29291	3.24248	3.87009	4.19245	4.19245	4.62893	4.80994	4.58699
mmu-miR-718	1.17508	down	1.48036	down	4.29279	down	2.15515	2.04514	1.55728	0.056529	0.0539858	0.0395748	1.41259	1.66166	1.68374	2.22712	1.97023	2.25849
mmu-miR-721	1.18506	down	1.7145	down	2.18591	down	8.25621	8.00643	7.90936	7.31355	7.18648	7.02215	7.39603	7.64842	7.52907	8.43204	8.21863	8.25621
mmu-miR-7a*	1.64921	down	2.04596	down	2.32728	down	0.0179283	0.964464	0.658312	0.056529	0.0539858	0.0395748	0.673067	0.00863695	0.025994	0.775667	1.43468	1.59568
mmu-miR-804	1.02271	up	3.39412	down	5.2634	down	1.84863	3.48224	2.10438	0.056529	0.0539858	0.0395748	0.765473	1.25749	0.025994	2.53924	2.39288	2.40595
mmu-miR-872	1.66927	down	2.50585	down	2.47709	down	4.21389	5.48745	5.46318	4.50891	4.4585	4.48884	4.58699	4.28972	4.52958	5.77182	5.77182	5.83855
mmu-miR-874	1.15833	down	1.53929	down	2.21482	down	6.83147	6.01445	5.57118	5.39654	5.25185	4.96329	5.61593	5.79872	5.77182	6.42363	6.26784	6.36177
mmu-miR-9	2.02687	down	4.89283	down	12.2781	down	4.55035	7.76986	7.86721	4.14977	4.24689	3.99446	5.57118	5.4416	5.36038	7.73766	7.73766	7.76986
mmu-miR-9*	2.10757	down	5.17467	down	32.2996	down	2.53924	5.39654	5.51169	0.056529	0.0539858	1.52336	3.24248	3.12371	3.19362	5.55151	5.55151	5.57118
mmu-miR-92a	1.37366	down	2.87363	down	2.9427	down	10.8074	10.8074	11.4945	9.80026	9.89964	10.1121	10.1121	9.80026	10.0024	11.4945	11.4945	11.4945
mmu-miR-96	1.05444	up	3.08881	up	3.30891	up	5.94101	7.97116	7.61606	8.77467	8.8516	8.8516	8.77467	8.72796	8.67733	7.11277	7.09302	7.09302
mmu-miR-99a	1.00525	up	65.0177	down	63.4326	down	6.30514	5.69283	6.13622	0.056529	0.0539858	0.0395748	0.00863695	0.00863695	0.025994	6.01445	6.0606	6.0365
mmu-miR-99b	1.39489	up	2.85644	up	3.46383	up	6.90694	5.30269	5.99163	7.2883	7.39603	7.45358	7.18648	7.07175	7.04524	5.51169	5.63319	5.61593
